# Supplementary material for: Ex Vivo Immune Function and Modulatory Effects of Calcitriol in Dogs with Naturally Occurring Diabetes Mellitus
Source: MDPI journal article supplement (doi:10.3390/vetsci11050193), 2024-04-28
Supplement: s1 [file s1]

**Supplemental Figure S1.** Box and whisker plots illustrating (a) percentage of granulocytes and monocytes (GM) phagocytizing opsonized- *Escherichia coli* (*E. coli*) and (b) the mean fluorescent intensity (MFI) (i.e., the average number of *E. coli* phagocytized per cell) calcitriol and ethanol interventions, irrespective of group (naturally occurring diabetes mellitus [NODM] or non-diabetic control). Each of the 40 dogs, 20 per group (NODM or non-diabetic control), had a measure of phagocytosis for each intervention, for a total of 40 values per group for each plot. Line at median, bounds of box at the 25th and 75th percentile, whiskers at the upper and lower adjacent values (Tukey method), and dots at outliers beyond the adjacent values.

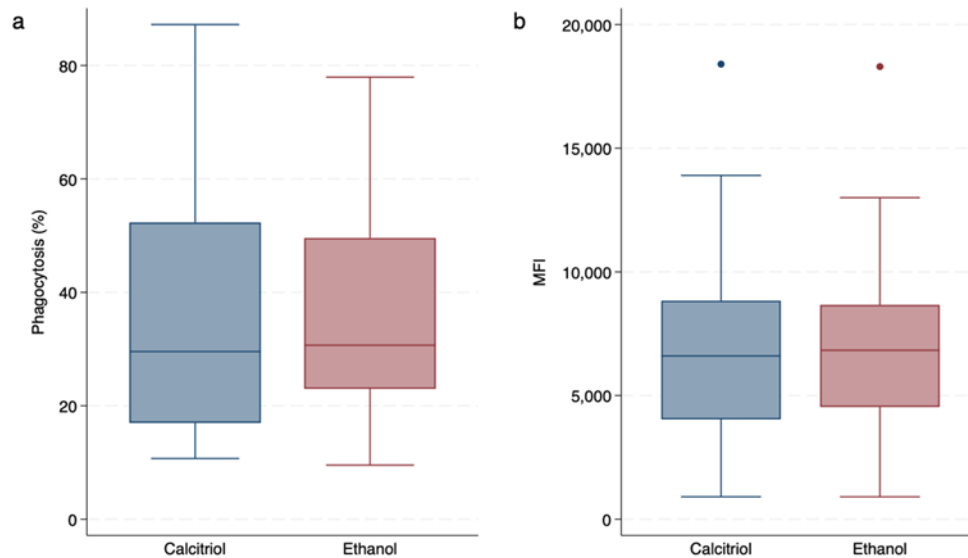

**Supplemental Figure S2.** Box and whisker plots illustrating (a) percentage of granulocytes and monocytes (GM) phagocytizing opsonized- *Escherichia coli* (*E. coli*) and (b) the mean fluorescent intensity (MFI) (i.e., the average number of *E. coli* phagocytized per cell) between dogs with controlled and uncontrolled naturally occurring diabetes mellitus (NODM), irrespective of diluent intervention (i.e., calcitriol or ethanol). Each of the 20 dogs, 10 per group (controlled or uncontrolled), had a measure of phagocytosis for each intervention, for a total of 20 values per group for each plot. Line at median, bounds of box at the 25th and 75th percentile, whiskers at the upper and lower adjacent values (Tukey method), and dots at outliers beyond the adjacent values.

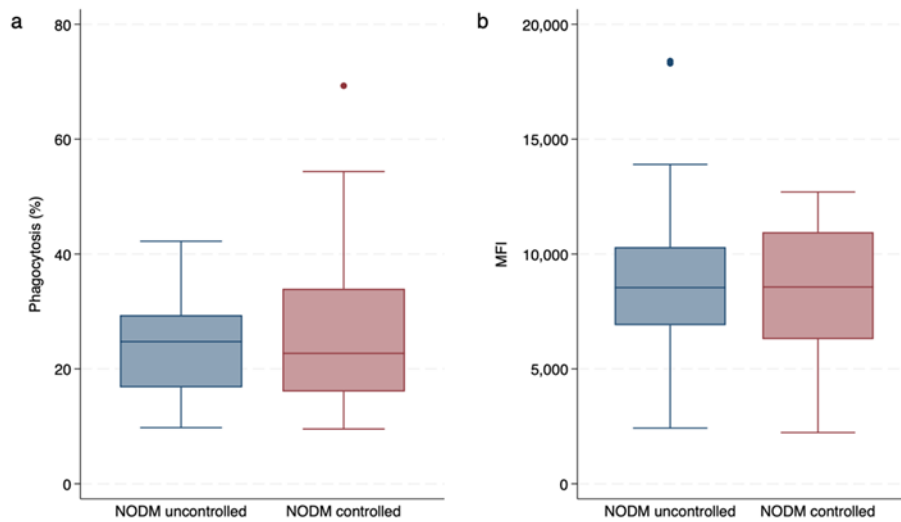

**Supplemental Table S1.** Median, interquartile range (IQR), and range for each cytokine by group (i.e., naturally occurring diabetic mellitus [NODM] or non-diabetic control; n = 20 per group), intervention, and stimulant.

| Cytokine | Group   | Intervention | Stimulant | Median | IQR          | Range        |
|----------|---------|--------------|-----------|--------|--------------|--------------|
| IL-6     | Control | Ethanol      | LPS       | 87     | 49-147       | 49-256       |
|          |         |              | LTA       | 49     | 49-59        | 49-97        |
|          |         |              | PBS       | 49     | 49-49        | 49-104       |
|          |         | Calcitriol   | LPS       | 71     | 51-167       | 49-348       |
|          |         |              | LTA       | 52     | 49-94        | 49-141       |
|          |         |              | PBS       | 49     | 49-49        | 49-101       |
|          | NODM    | Ethanol      | LPS       | 244    | 124-504      | 49-1,369     |
|          |         |              | LTA       | 168    | 101-317      | 49-1,086     |
|          |         |              | PBS       | 49     | 49-49        | 49-237       |
|          |         | Calcitriol   | LPS       | 416    | 212-674      | 72-1,255     |
|          |         |              | LTA       | 318    | 202-695      | 108-1,231    |
|          |         |              | PBS       | 49     | 49-49        | 49-104       |
| IL-8     | Control | Ethanol      | LPS       | 7,831  | 5,373-11,786 | 3,214-16,962 |
|          |         |              | LTA       | 8,489  | 5,748-11,485 | 834-17,746   |
|          |         |              | PBS       | 4,065  | 1,723-8,052  | 90-14,622    |
|          |         | Calcitriol   | LPS       | 7,142  | 6,011-10,115 | 2,736-15,311 |
|          |         |              | LTA       | 7,485  | 5,059-10,286 | 2,557-18,442 |
|          |         |              | PBS       | 4,081  | 1,516-7,086  | 88-11,593    |
|          | NODM    | Ethanol      | LPS       | 14,910 | 9,115-20,260 | 4,944-38,460 |
|          |         |              | LTA       | 15,491 | 7,888-20,197 | 5,073-39,903 |
|          |         |              | PBS       | 12,637 | 5,459-19,013 | 4,138-28,650 |
|          |         | Calcitriol   | LPS       | 15,739 | 7,345-21,597 | 5,275-50,122 |
|          |         |              |           |        |              |              |

|               |         |            |     |        |              |              |
|---------------|---------|------------|-----|--------|--------------|--------------|
|               |         |            | LTA | 14,811 | 8,348-21479  | 5,064-33,342 |
|               |         |            | PBS | 10,231 | 5,706-13,603 | 1,430-34,463 |
| IL-10         | Control | Ethanol    | LPS | 1,965  | 1,438-3,559  | 693-9,044    |
|               |         |            | LTA | 831    | 456-1,794    | 132-3,839    |
|               |         |            | PBS | 91     | 49-199       | 49-6,737     |
|               |         | Calcitriol | LPS | 2,122  | 910-3,301    | 373-8,412    |
|               |         |            | LTA | 1,052  | 667-2,518    | 201-3,716    |
|               |         |            | PBS | 180    | 79-500       | 49-2,297     |
|               | NODM    | Ethanol    | LPS | 2,286  | 1,716-3,792  | 739-8,170    |
|               |         |            | LTA | 2,400  | 2,072-3,524  | 420-6,349    |
|               |         |            | PBS | 154    | 450-293      | 49-849       |
|               |         | Calcitriol | LPS | 2,429  | 1,375-4,102  | 519-4,878    |
|               |         |            | LTA | 2,688  | 1,807-3,642  | 508-6,598    |
|               |         |            | PBS | 211    | 52-593       | 49-1,956     |
| TNF- $\alpha$ | Control | Ethanol    | LPS | 534    | 341-1,641    | 204-6,078    |
|               |         |            | LTA | 440    | 249-649      | 128-4,033    |
|               |         |            | PBS | 95     | 49-235       | 49-6,981     |
|               |         | Calcitriol | LPS | 290    | 207-1,037    | 75-3,948     |
|               |         |            | LTA | 268    | 144-453      | 70-2,113     |
|               |         |            | PBS | 51     | 49-96        | 49-2706      |
|               | NODM    | Ethanol    | LPS | 1,260  | 670-1,521    | 419-5,048    |
|               |         |            | LTA | 933    | 728-1,188    | 305-3,510    |
|               |         |            | PBS | 88     | 58-164       | 49-554       |
|               |         | Calcitriol | LPS | 504    | 617-1,560    | 159-3,361    |
|               |         |            | LTA | 753    | 471-1,395    | 232-2,414    |
|               |         |            | PBS | 49     | 49-83        | 49-192       |
